# Supplementary material for: Safety Assessment of Concurrent Vaccination with the HPV Vaccine and the COVID-19 Vaccine in Fujian Province, China: A Retrospective Study
Source: MDPI journal article supplement (doi:10.3390/vaccines12060673), 2024-06-18
Supplement: s1 [file s1]

**Table S1.** Survey instrument for adverse events (AEs) of with the human papillomavirus (HPV) vaccine and the coronavirus disease 2019 (COVID-19) vaccine (relevant parts of the study).

| Survey instrument                                                                                                                                                                                                                                                                                                                                                                                                                                                                                                                                                                                                                                                                                                                                                                                                                                                                                                                                                                                                                                                                                                                                                                                                                                                                                                                                                                                                                                                                                                                                                                                                                                                                                                                                                                                                                                                                                                                                                                                                                                                                                                                                                                                                                                                                                                                                                                                                                                                                                                                                                                                                                                                                                                                                                                                                                                                                                                                                                                                                                                                                                                                                                                                                                                                                                                                                                                                                                                                                                                                                                                                                                                                                                                                                                                                                                                                                                                                                    |
|------------------------------------------------------------------------------------------------------------------------------------------------------------------------------------------------------------------------------------------------------------------------------------------------------------------------------------------------------------------------------------------------------------------------------------------------------------------------------------------------------------------------------------------------------------------------------------------------------------------------------------------------------------------------------------------------------------------------------------------------------------------------------------------------------------------------------------------------------------------------------------------------------------------------------------------------------------------------------------------------------------------------------------------------------------------------------------------------------------------------------------------------------------------------------------------------------------------------------------------------------------------------------------------------------------------------------------------------------------------------------------------------------------------------------------------------------------------------------------------------------------------------------------------------------------------------------------------------------------------------------------------------------------------------------------------------------------------------------------------------------------------------------------------------------------------------------------------------------------------------------------------------------------------------------------------------------------------------------------------------------------------------------------------------------------------------------------------------------------------------------------------------------------------------------------------------------------------------------------------------------------------------------------------------------------------------------------------------------------------------------------------------------------------------------------------------------------------------------------------------------------------------------------------------------------------------------------------------------------------------------------------------------------------------------------------------------------------------------------------------------------------------------------------------------------------------------------------------------------------------------------------------------------------------------------------------------------------------------------------------------------------------------------------------------------------------------------------------------------------------------------------------------------------------------------------------------------------------------------------------------------------------------------------------------------------------------------------------------------------------------------------------------------------------------------------------------------------------------------------------------------------------------------------------------------------------------------------------------------------------------------------------------------------------------------------------------------------------------------------------------------------------------------------------------------------------------------------------------------------------------------------------------------------------------------------------------|
| <p>Hello, are you Ms. XXX? We are staff members from Fujian Maternal and Child Health Hospital. We would like to follow up with you on your physical health after receiving the HPV vaccine and COVID-19 vaccine for vaccine safety research. This research was approved by the Ethics Committee of Fujian Maternal and Child Health Hospital (2023KYLLR01025). We will de-identify your data and ensure that your personal privacy will not be disclosed. The data will use for statistical analysis only. Would you like to take part in our research and answer a few questions?</p> <p><input type="checkbox"/>Yes</p> <p><input type="checkbox"/>No</p> <p>The researchers checked for personally information such as the participant identity card [ID], name, date of birth (age), address, vaccine name, vaccination manufacturer, vaccination date and previous history of HPV infection to confirm the identity of the participants.</p> <p>Questions about HPV vaccine</p> <p>1. Have you completed all HPV vaccination procedures?</p> <p><input type="checkbox"/>Yes,____(If so, the researchers need to check the vaccination time.)</p> <p><input type="checkbox"/>No</p> <p>2. Did you experience any local AEs after receiving the HPV vaccine, such as pain, induration, redness, swelling, rash and pruritus at the injection site?</p> <p><input type="checkbox"/>Yes,____(If so, what are the AEs? When the AEs occurred? How long did it last? What is the severity level?)</p> <p><input type="checkbox"/>No</p> <p>3. Did you experience any systemic AEs after receiving the HPV vaccine, such as fever, diarrhea, vomiting, nausea, muscle pain, headache, syncope, cough, itching, insomnia, drowsiness, anaphylaxis, fatigue and pain?</p> <p><input type="checkbox"/>Yes,____(If so, what are the AEs? When the AEs occurred? How long did it last? What is the severity level?)</p> <p><input type="checkbox"/>No</p> <p>4. Did you experience menstrual irregularities after receiving the HPV vaccine, such as short cycle, long cycle, irregular menstrual cycles, prolonged menstruation duration, light menstrual bleeding, heavy menstrual bleeding (HMB), dysmenorrhea, intermenstrual bleeding (IMB)?</p> <p><input type="checkbox"/>Yes,____(If so, what are the AEs? When the AEs occurred? How long did it last? What is the severity level?)</p> <p><input type="checkbox"/>No</p> <p>Questions about COVID-19 vaccine</p> <p>1. Have you completed all COVID-19 vaccination procedures?</p> <p><input type="checkbox"/>Yes,____(If so, the researchers need to check the vaccination time)</p> <p><input type="checkbox"/>No</p> <p>2. Did you experience any local AEs after receiving the COVID-19 vaccine, such as pain, induration, redness, swelling, rash and pruritus at the injection site?</p> <p><input type="checkbox"/>Yes,____(If so, what are the AEs? When the AEs occurred? How long did it last? What is the severity level?)</p> <p><input type="checkbox"/>No</p> <p>3. Did you experience any systemic AEs after receiving the COVID-19 vaccine, such as fever, diarrhea, vomiting, nausea, muscle pain, headache, syncope, cough, itching, insomnia, drowsiness, anaphylaxis, fatigue and pain?</p> <p><input type="checkbox"/>Yes,____(If so, what are the AEs? When the AEs occurred? How long did it last? What is the severity level?)</p> <p><input type="checkbox"/>No</p> <p>4. Did you experience menstrual irregularities after receiving the COVID-19 vaccine, such as short cycle, long cycle, irregular menstrual cycles, prolonged menstruation duration, light menstrual bleeding, HMB, dysmenorrhea, IMB?</p> <p><input type="checkbox"/>Yes,____(If so, what are the AEs? When the AEs occurred? How long did it last? What is the severity level?)</p> <p><input type="checkbox"/>No</p> <p>The follow-up is over, thank you for your patience and cooperation.</p> |

**Table S2.** Descriptive baseline information of the study participants (n = 2682).

|                                     | Participants (%) |
|-------------------------------------|------------------|
| Total (n)                           | 2682 (100)       |
| Age (in years)                      |                  |
| Median (IQR)                        | 33 (26-38)       |
| Residence <sup>1</sup>              |                  |
| Fuzhou city Districts               | 2349 (87.60)     |
| Fuzhou Counties                     | 150 (5.60)       |
| Not Fuzhou (within Fujian Province) | 83 (3.10)        |
| Unknown                             | 100 (3.70)       |
| Type of HPV vaccine                 |                  |
| Cecolin®                            | 570 (21.30)      |
| Cervarix®                           | 527 (19.60)      |
| Gardasil®/Gardasil 9®               | 1585 (59.10)     |
| Previous history of HPV infection   |                  |
| Negative                            | 423 (15.80)      |
| Positive                            | 67 (2.50)        |
| Unknown                             | 2192 (81.70)     |

<sup>1</sup> Fuzhou is divided into five city districts (Gulou, Jinan, Cangshan, Taijiang, Mawei) and eight counties (Changle, Fuqing, Minhou, Luoyuan, Lianjiang, Pingtan, Yongtai, Minqing).

**Table S3.** Definitions of outcomes.

| Outcome                               | Definition                                                                                                                                                                                                                                                    |
|---------------------------------------|---------------------------------------------------------------------------------------------------------------------------------------------------------------------------------------------------------------------------------------------------------------|
| Adverse events (AEs) <sup>1</sup>     | Adverse events refer to all adverse medical events that occur in participants after vaccination, which may manifest as symptoms, signs, or illnesses, but may not necessarily be related to the vaccine                                                       |
| Local AEs <sup>1</sup>                | Local adverse events refer to adverse events occurring at the vaccination site, such as pain, induration, redness, swelling, rash, and itching.                                                                                                               |
| Systemic AEs <sup>1</sup>             | Systemic reactions included fever, diarrhea, vomit, nausea, myalgia, headache, syncope, cough, itching, insomnia, drowsiness, allergic reaction, fatigue, pain, other.                                                                                        |
| Menstrual irregularities <sup>2</sup> | It is defined as bleeding from the uterine corpus that is irregularities in duration, volume, frequency, and/or regularity, and has been present for the majority of the preceding 6 months.                                                                  |
| Menstrual cycle                       | Menstrual cycle is defined as the number of days between the first day of the previous menstrual cycle and the first day of the current menstrual cycle.<br>Short cycle (Frequent) is defined as <24 days.<br>Long cycle (Infrequent) is defined as >38 days. |
| Regularity                            | Regular in a way that you could usually predict about when the next period would start.<br>Irregular menstrual cycles are defined as ≥8-10 day variations, depending on age (18-25 years ≥10 days; 26-41 years ≥8 days; 42-45 years ≥10 days).                |
| Menstrual duration                    | Menstrual duration is defined as the number of days a person bleeds during their menstrual period.<br>Prolonged menstrual duration is defined as menstrual duration > 8 days.                                                                                 |
| Flow volume                           | Flow volume is defined as the amount of bleeding per menstrual period, which is determined subjectively by each individual.                                                                                                                                   |
| Dysmenorrhea                          | Flow volume is divided into light menstrual bleeding and heavy menstrual bleeding (HMB).<br>HMB is defined as excessive menstrual blood loss, which interferes with a woman's physical, social, emotional and/or material quality of life.                    |
| Intermenstrual Bleeding (IMB)         | Dysmenorrhea is defined as abdominal pain during menstruation.<br>Spontaneous bleeding occurring between menstrual periods.                                                                                                                                   |

<sup>1</sup> According to Guidelines for grading standards of adverse events in clinical studies of prophylactic vaccines (No. 102, 2019) issued by the China National Medical Products Administration. <sup>2</sup> According to the guidelines updated by the

International Federation of Obstetrics and Gynecology (FIGO) in 2018.

**Table S4.** Comparison of AEs to the HPV vaccine within different sequences of vaccination (n = 1416) (%).

|                                 | <b>Before group<sup>1</sup><br/>n=773</b> | <b>Concurrent group<sup>2</sup><br/>n=418</b> | <b>After group<sup>3</sup><br/>n=225</b> | <b>P</b> | <b>P<sub>1,2</sub></b> | <b>P<sub>1,3</sub></b> | <b>P<sub>2,3</sub></b> |
|---------------------------------|-------------------------------------------|-----------------------------------------------|------------------------------------------|----------|------------------------|------------------------|------------------------|
| Total AEs                       | 225 (29.1)                                | 124 (29.7)                                    | 44 (19.6)                                | 0.011    | 0.842                  | 0.005                  | 0.006                  |
| Local AEs                       | 172 (22.3)                                | 81 (19.4)                                     | 18 (8.0)                                 | <0.001   | 0.266                  | <0.001                 | <0.001                 |
| Pain                            | 163 (21.1)                                | 79 (18.9)                                     | 16 (7.1)                                 | <0.001   | 0.407                  | <0.001                 | <0.001                 |
| Systemic AEs                    | 69 (8.9)                                  | 50 (12.0)                                     | 25 (11.1)                                | 0.217    |                        |                        |                        |
| Acute anaphylaxis               | 0 (0.0)                                   | 1 (0.2)                                       | 2 (0.9)                                  | 0.026    | 0.351                  | 0.051                  | 0.281                  |
| Menstrual irregularities        | 54 (7.0)                                  | 44 (10.5)                                     | 23 (10.2)                                | 0.069    |                        |                        |                        |
| Prolonged menstruation duration | 0 (0.0)                                   | 4 (1.0)                                       | 4 (1.8)                                  | 0.001    | 0.015                  | 0.003                  | 0.460                  |
| Dysmenorrhea                    | 0 (0.0)                                   | 1 (0.2)                                       | 2 (0.9)                                  | 0.026    | 0.351                  | 0.051                  | 0.281                  |

<sup>1</sup> Received the HPV vaccine before COVID-19 vaccination. <sup>2</sup> The HPV vaccine and COVID-19 vaccines were administered concurrently. <sup>3</sup> Received the HPV vaccine after COVID-19 vaccination.

**Table S5.** Comparison of AEs to the COVID-19 vaccine in with different sequences of vaccination (n = 1416) (%).

|                          | <b>Before group<sup>1</sup><br/>n =773</b> | <b>Concurrent group<sup>2</sup><br/>n=418</b> | <b>After group<sup>3</sup><br/>n=225</b> | <b>P</b> | <b>P<sub>1,2</sub></b> | <b>P<sub>1,3</sub></b> | <b>P<sub>2,3</sub></b> |
|--------------------------|--------------------------------------------|-----------------------------------------------|------------------------------------------|----------|------------------------|------------------------|------------------------|
| Total AEs                | 294 (38)                                   | 128 (30.6)                                    | 22 (9.8)                                 | <0.001   | 0.011                  | <0.001                 | <0.001                 |
| 19-28 (n=349)            | 71 (34.8)                                  | 23 (23.5)                                     | 5 (10.6)                                 | 0.002    | 0.048                  | <0.001                 | 0.075                  |
| 29-38 (n=675)            | 162 (43.9)                                 | 78 (39.0)                                     | 12 (11.3)                                | <0.001   | 0.286                  | <0.001                 | <0.001                 |
| 39-45 (n=324)            | 52 (33.1)                                  | 22 (23.2)                                     | 5 (6.9)                                  | <0.001   | 0.118                  | <0.001                 | 0.005                  |
| Local AEs                | 202 (26.1)                                 | 74 (17.7)                                     | 13 (5.8)                                 | <0.001   | 0.001                  | <0.001                 | <0.001                 |
| Pain                     | 24.6 (188)                                 | 69 (16.5)                                     | 13 (5.8)                                 | <0.001   | 0.002                  | <0.001                 | <0.001                 |
| Swelling                 | 3.6 (28)                                   | 12 (2.9)                                      | 1 (0.4)                                  | 0.041    | 0.509                  | 0.011                  | 0.040                  |
| Systemic AEs             | 15.5 (120)                                 | 67 (16.0)                                     | 12 (5.3)                                 | <0.001   | 0.867                  | <0.001                 | <0.001                 |
| Menstrual irregularities | 4.9 (38)                                   | 19 (10.5)                                     | 2 (0.9)                                  | 0.026    | 0.780                  | 0.006                  | 0.017                  |

<sup>1</sup> Received the HPV vaccine before COVID-19 vaccination. <sup>2</sup> The HPV vaccine and COVID-19 vaccines were administered concurrently. <sup>3</sup> Received the HPV vaccine after COVID-19 vaccination.

**Table S6.** AEs following different types of HPV vaccination (n = 1416) (%).

|                                 | <b>Cecolin<sup>®1</sup></b><br><b>n=373</b> | <b>Cervarix<sup>®2</sup></b><br><b>n=281</b> | <b>Gardasil<sup>®</sup>/</b><br><b>Gardasil 9<sup>®3</sup></b><br><b>n=762</b> | <b>P</b> | <b>P<sub>1,2</sub></b> | <b>P<sub>1,3</sub></b> | <b>P<sub>2,3</sub></b> |
|---------------------------------|---------------------------------------------|----------------------------------------------|--------------------------------------------------------------------------------|----------|------------------------|------------------------|------------------------|
| Total AEs                       | 67 (18.0)                                   | 98 (34.9)                                    | 228 (29.9)                                                                     | <0.001   | <0.001                 | <0.001                 | 0.132                  |
| 9-18 (n=68)                     | 0 (0.0)                                     | 5 (45.5)                                     | 16 (28.6)                                                                      | 0.517    |                        |                        |                        |
| 19-28 (n=349)                   | 6 (9.7)                                     | 6 (26.1)                                     | 93 (35.2)                                                                      | <0.001   | 0.078                  | <0.001                 | 0.494                  |
| 29-38 (n=675)                   | 43 (22.1)                                   | 69 (44.5)                                    | 97 (29.8)                                                                      | <0.001   | <0.001                 | 0.066                  | 0.002                  |
| 39-45 (n=324)                   | 18 (15.7)                                   | 18 (19.6)                                    | 22 (18.8)                                                                      | 0.758    |                        |                        |                        |
| Local AEs                       | 37 (9.9)                                    | 80 (28.5)                                    | 154 (20.2)                                                                     | <0.001   | <0.001                 | <0.001                 | 0.006                  |
| Pain                            | 34 (9.1)                                    | 77 (27.4)                                    | 147 (19.3)                                                                     | <0.001   | <0.001                 | <0.001                 | 0.005                  |
| Induration                      | 0 (0.0)                                     | 1 (0.4)                                      | 3 (0.4)                                                                        | 0.653    |                        |                        |                        |
| Redness                         | 1 (0.3)                                     | 5 (1.6)                                      | 2 (0.3)                                                                        | 0.016    | 0.089                  | 1.000                  | 0.018                  |
| Swelling                        | 7 (1.9)                                     | 15 (5.3)                                     | 23 (3.0)                                                                       | 0.038    | 0.017                  | 0.326                  | 0.093                  |
| Rash                            | 1 (0.3)                                     | 0 (0.0)                                      | 0 (0.0)                                                                        | 0.462    |                        |                        |                        |
| Pruritus                        | 0 (0.0)                                     | 0 (0.0)                                      | 0 (0.0)                                                                        | 1.000    |                        |                        |                        |
| Systemic AEs                    | 31 (8.3)                                    | 24 (8.5)                                     | 89 (11.7)                                                                      | 0.126    |                        |                        |                        |
| Fever                           | 0 (0.0)                                     | 1 (0.0)                                      | 3 (0.4)                                                                        | 0.429    |                        |                        |                        |
| Diarrhea                        | 0 (0.0)                                     | 0 (0.0)                                      | 0 (0.0)                                                                        | 1.000    |                        |                        |                        |
| Vomiting                        | 0 (0.0)                                     | 0 (0.0)                                      | 1 (0.1)                                                                        | 1.000    |                        |                        |                        |
| Nausea                          | 0 (0.0)                                     | 0 (0.0)                                      | 1 (0.1)                                                                        | 1.000    |                        |                        |                        |
| Muscle pain                     | 0 (0.0)                                     | 0 (0.0)                                      | 0 (0.0)                                                                        | 1.000    |                        |                        |                        |
| Headache                        | 0 (0.0)                                     | 0 (0.0)                                      | 0 (0.0)                                                                        | 1.000    |                        |                        |                        |
| Syncope                         | 0 (0.0)                                     | 0 (0.0)                                      | 0 (0.0)                                                                        | 1.000    |                        |                        |                        |
| Cough                           | 1 (0.3)                                     | 1 (0.4)                                      | 0 (0.0)                                                                        | 0.213    |                        |                        |                        |
| Itching <sup>4</sup>            | 0 (0.0)                                     | 2 (0.7)                                      | 0 (0.0)                                                                        | 0.039    | 0.184                  | 1.000                  | 0.072                  |
| Insomnia                        | 0 (0.0)                                     | 0 (0.0)                                      | 0 (0.0)                                                                        | 1.000    |                        |                        |                        |
| Drowsiness                      | 0 (0.0)                                     | 1 (0.4)                                      | 8 (1.2)                                                                        | 0.083    |                        |                        |                        |
| Acute anaphylaxis               | 3 (0.8)                                     | 0 (0.0)                                      | 0 (0.0)                                                                        | 0.026    | 0.264                  | 0.035                  | 1.000                  |
| Fatigue                         | 1 (0.3)                                     | 1 (0.4)                                      | 7 (0.9)                                                                        | 0.3491   |                        |                        |                        |
| Pain <sup>5</sup>               | 1 (0.4)                                     | 0 (0.0)                                      | 0 (0.0)                                                                        | 0.462    |                        |                        |                        |
| Menstrual irregularities        | 26 (7.0)                                    | 20 (7.1)                                     | 75 (9.8)                                                                       | 0.174    |                        |                        |                        |
| Short cycle (Frequent)          | 0 (0.0)                                     | 0 (0.0)                                      | 0 (0.0)                                                                        | 1.000    |                        |                        |                        |
| Long cycle (Infrequent)         | 0 (0.0)                                     | 0 (0.0)                                      | 2 (0.3)                                                                        | 1.000    |                        |                        |                        |
| Irregular menstrual cycles      | 5 (1.3)                                     | 2 (0.7)                                      | 24 (3.1)                                                                       | 0.022    | 0.705                  | 0.074                  | 0.024                  |
| Prolonged menstruation duration | 6 (1.6)                                     | 1 (0.4)                                      | 1 (0.1)                                                                        | 0.007    | 0.248                  | 0.006                  | 0.466                  |
| Light menstrual bleeding        | 10 (2.7)                                    | 3 (1.1)                                      | 14 (1.8)                                                                       | 0.307    |                        |                        |                        |
| HMB                             | 3 (0.8)                                     | 0 (0.0)                                      | 3 (0.4)                                                                        | 0.349    |                        |                        |                        |
| Dysmenorrhea                    | 2(0.5)                                      | 0 (0.0)                                      | 1 (0.1)                                                                        | 0.274    |                        |                        |                        |
| IMB                             | 0 (0.0)                                     | 1 (0.4)                                      | 1 (0.1)                                                                        | 0.427    |                        |                        |                        |

<sup>4</sup>Itching: non-vaccination site itching. <sup>5</sup>Pain: pain in non-vaccination areas other than muscle pain, joint pain, and headache.

**A**

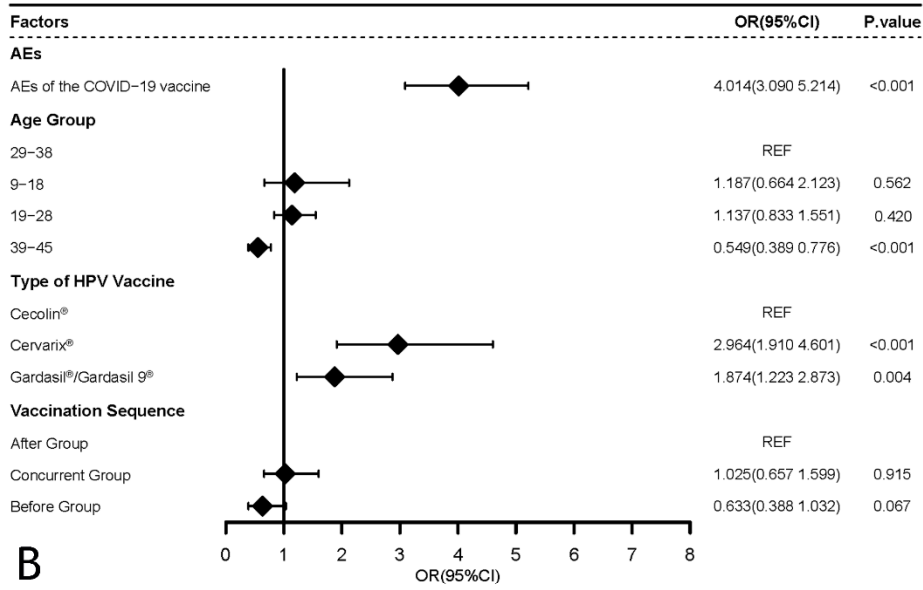

**B**

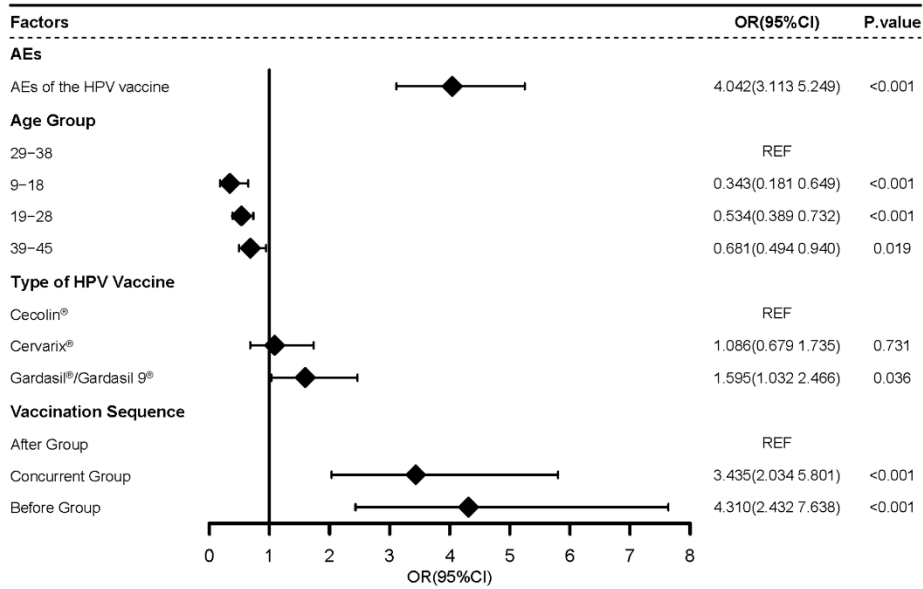

**Figure S1.** (A) Analysis of risk factors for the occurrence of AEs to HPV vaccines (n = 1416). (B) Analysis of risk factors for the occurrence of AEs to COVID-19 vaccines (n = 1416).
